# Supplementary material for: The global burden of neck pain: estimates from the Global Burden of Disease 2010 study
Source: HighWire-hosted journal article supplement (doi:10.1136/annrheumdis-2013-204431), 2014-01-31
Supplement: annrheumdis-2013-204431supp.pdf [file annrheumdis-2013-204431supp.pdf]

**Supplementary table 7. Cross-tabulation of acute by chronic stress categorisation for total births for women with both acute and chronic stress measures available across the preconception period (N=5198).**

| <b>Acute stress</b>  | <b>Chronic stress</b> |                      | <b><i>Total</i></b> |
|----------------------|-----------------------|----------------------|---------------------|
|                      | <b>None/minimal</b>   | <b>Moderate/high</b> |                     |
| <b>None/minimal</b>  | 3152<br>83.9%         | 607<br>16.1%         | 3759                |
| <b>Moderate/high</b> | 309<br>21.5%          | 1130<br>78.5%        | 1439                |
| <b><i>Total</i></b>  | 3461                  | 1737                 | 5198                |
